# Supplementary material
Source: PubMed Central journal article supplement (PMC56943)
Supplement: pnas_181344198_1.pdf [file pnas_181344198_1.pdf]

## Oligonucleotide primers

MyoD1 gene (product size: 190 bp)

MyoD1+, 5'-TAACCTTCCACTCCCCTCACAGA-3'

MyoD1-, 5'-TGTTCTGTGTCGCTTAGGGATGC-3'

$\beta$ -minor globin gene promoter (product size: 231 bp)

$\beta$ -minor+, 5'-TGCGAGGATAAGAACAGACACTAC-3'

$\beta$ -minor-, 5'-ACAGACTCAGAAGCAAACGTAAGA-3'

$\beta$ -major globin promoter (product size: 217 bp)

$\beta$ -major+, 5'-GACAAACATTATTTCAGAGGGAGTA-3'

$\beta$ -major-, 5'-AAGCAAATGTGAGGAGCAACTGAT-3'

Intergenic region between  $\beta$  h2 gene and  $\beta$ -major gene (product size: 271 bp)

ith2-mj+, 5'-TCCTGGTTTATGAGCCTAGAAGAA-3'

ith2-mj-, 5'-AGACCTGATCCCCATTCCTATTCC-3'

Ey globin promoter (product size: 241 bp)

Ey+, 5'-GAGAGTTTTTGTGAAGGAGGAGC-3'

Ey-, 5'-CAGGAGTGTGAGAAGCAAGTACGT-3'

HS1 (product size: 336 bp)

HS1+, 5'-CTCTCCATAACCCATACCTCTT-3'

HS1-, 5'-CCAATTTTCTCCCTCCATGTTCTTCT-3'

HS2 (product size: 277 bp)

HS2+, 5'-CACTTCTTCATATTCTCTCTCTAG-3'

HS2-, 5'-CTTATTTTCTTTTCACCTTCCCTG-3'

HS3 (product size: 283 bp)

HS3+, 5'-GAGGAGAAAACAAACAGGAGGTCT-3'

HS3-, 5'-CCTTTGTCCTACTGCTCTCATGTT-3'

HS4 (product size: 309 bp)

HS4+, 5'-TTGCCCTCTTTACATCTAGCAGC-3'

HS4-, 5'-CACACACACCAAAAACAAAACCCCA-3'

HS5 (product size: 288 bp)

HS5v3+, 5'-AGGATGAGAAGTTGAATGCTGATCA-3'

HS5v3-, 5'-TTGGGGAAAAGAGAAGGTAGGCA-3'

HS6 (product size: 418 bp)

HS6+, 5'-GCCAAAATAGCTCAATAGTCTCGT-3'

HS6-, 5'-GAAGCTGTAAGGTCTGTTTGCT-3'

HS62.5 (product size: 264 bp)

HS62.5v3+, 5'-TCCTTCCAGAGTTAATACCCGC-3'

HS62.5 v3-, 5'-TTTGTGGATATGGGGTGTGGGTATT-3'
